# Supplementary material
Source: PubMed Central journal article supplement (PMC7963363)
Supplement: NIHMS1581981-supplement-1.pdf [file NIHMS1581981-supplement-1.pdf]

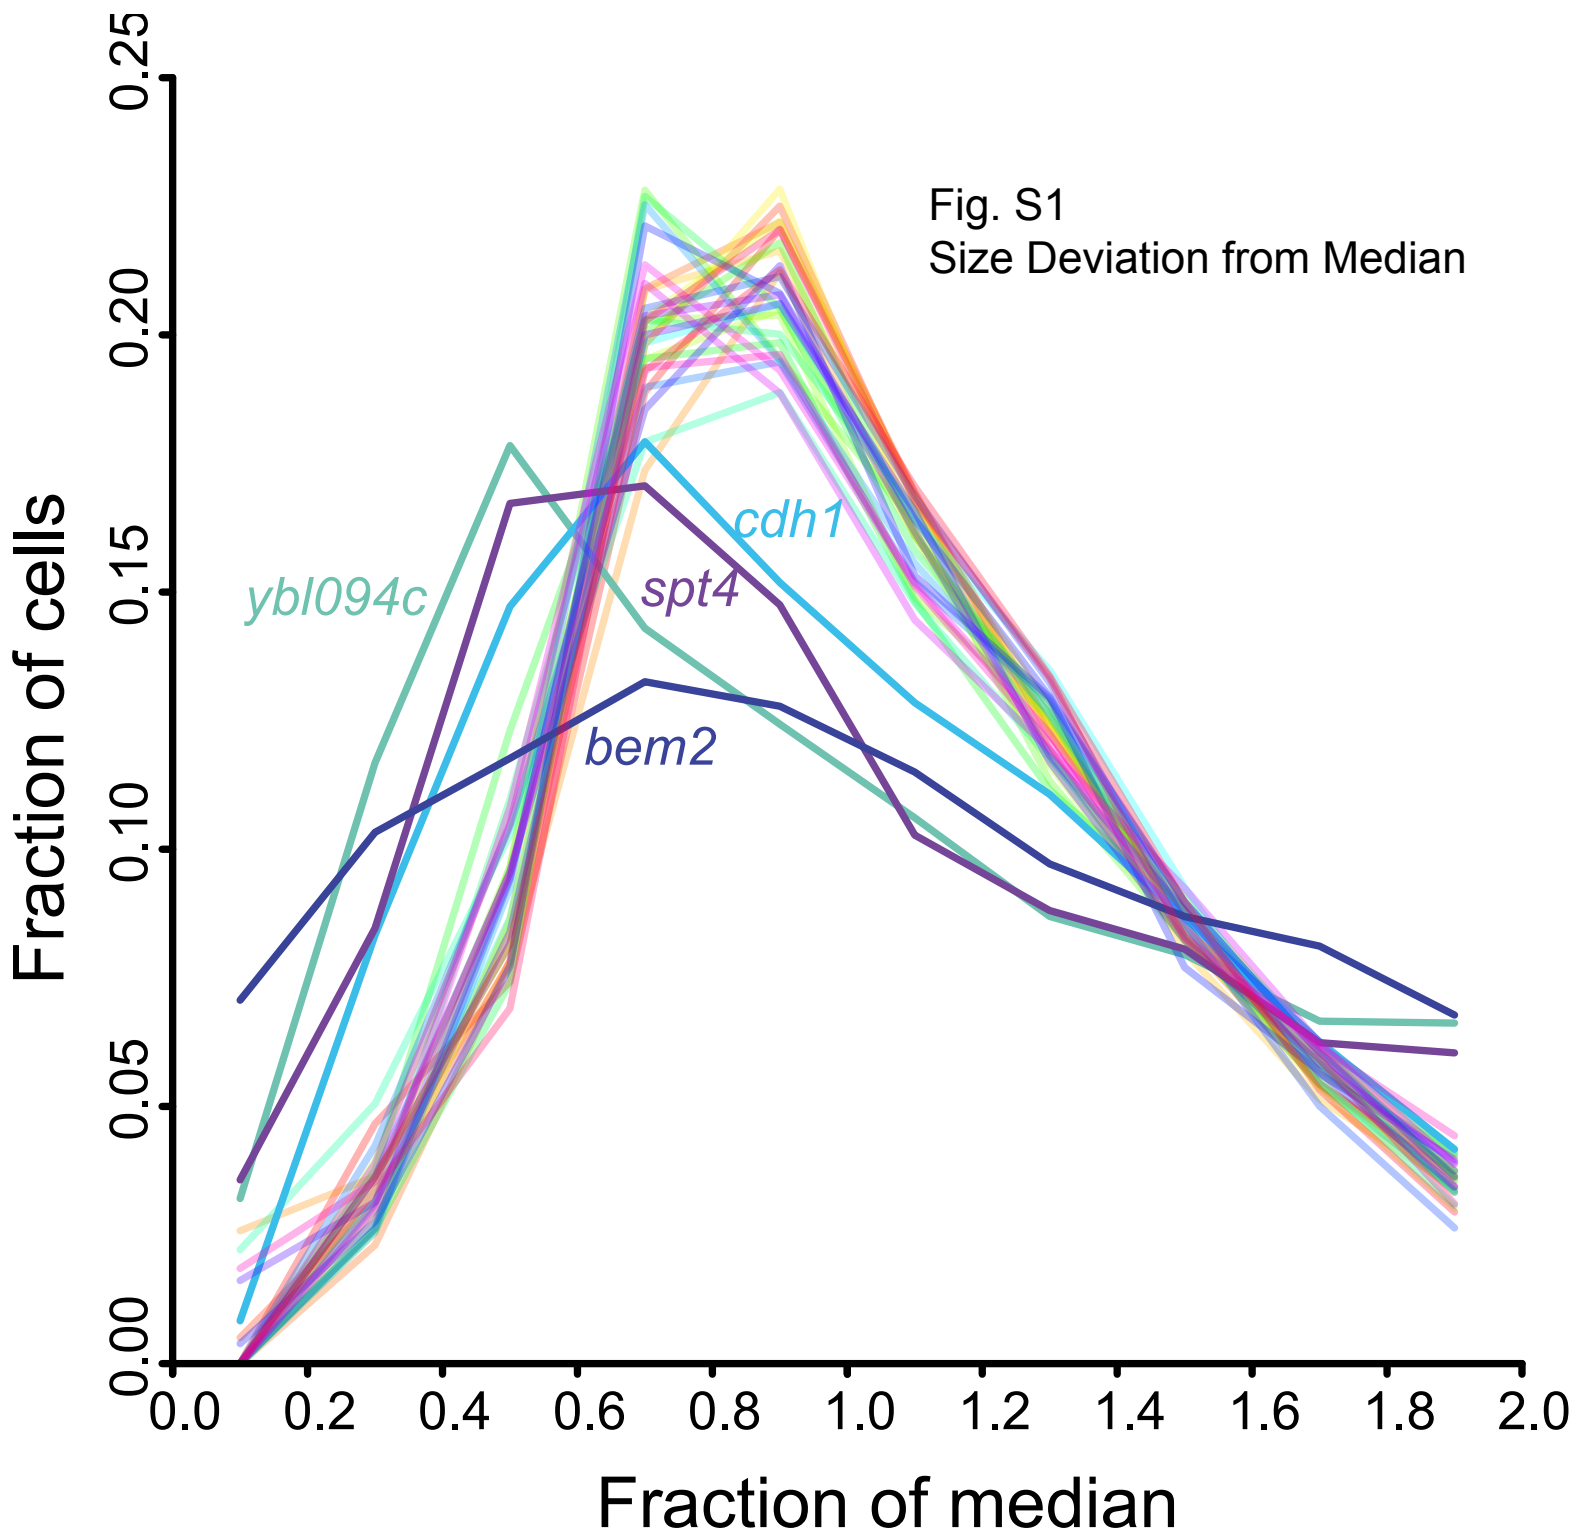

Figure S1. Size Deviation from the Median. Cell size distributions of 32 size mutants analyzed by the method of Coudreuse and Nurse (Related to Fig. 1).

The cell size data in Fig. 1E is replotted by the method of Coudreuse and Nurse (2010), but also including mutants *spt4*, *cdh1*, *bem2*, and *ybl094c*. We identified *bem2* and *ybl094c* as mutants with large CVs in genome wide screens.

Fig. S2  
Histone Ranks

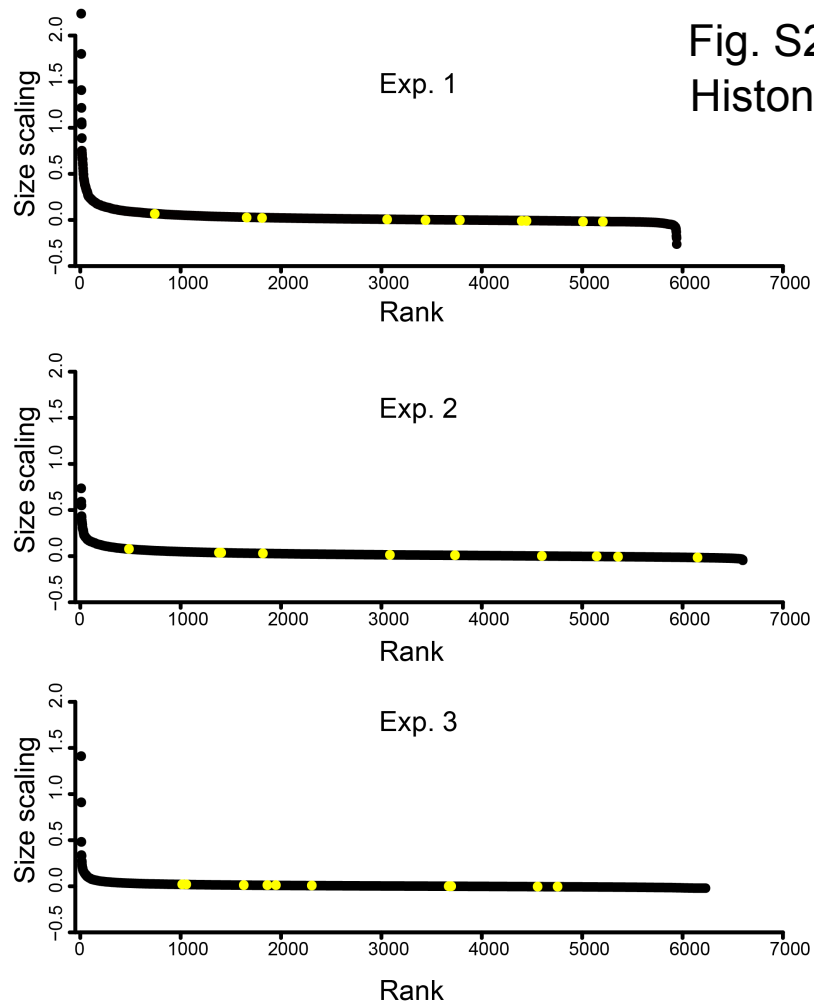

| Column1 | Expt. 1 | Expt. 2 | Expt. 3 | Spearman Correlation Coefficient: |      |
|---------|---------|---------|---------|-----------------------------------|------|
| HTA2    | 733     | 1396    | 1007    | Exp. 1 vs Exp. 2                  | 0.70 |
| HHF2    | 1803    | 1373    | 1048    | Exp. 1 vs Exp. 3                  | 0.90 |
| HTB2    | 1649    | 477     | 1621    | Exp. 2 vs Exp. 3                  | 0.87 |
| HHO1    | 3773    | 1811    | 1855    |                                   |      |
| HTB1    | 3431    | 3725    | 1941    |                                   |      |
| HHT2    | 3048    | 4590    | 2298    |                                   |      |
| HTA1    | 5000    | 3076    | 3662    |                                   |      |
| HHF1    | 4389    | 6141    | 3687    |                                   |      |
| HHT1    | 4437    | 5349    | 4548    |                                   |      |
| HTZ1    | 5198    | 5136    | 4747    |                                   |      |

Fig. S2. Histone Ranks. Histone genes have modest but reproducible scaling (Related to Fig. 2).  
Top. The ranks of 10 histone genes plotted for each of the three elutriation experiments.  
Bottom. The individual ranks are shown, with correlation coefficients between experiments. Even though the histones are mostly in the flat region, nevertheless their ranks are highly repeatable (Spearman correlations from 0.69 to 0.90).

Fig. S3  
Ribosome Scaling

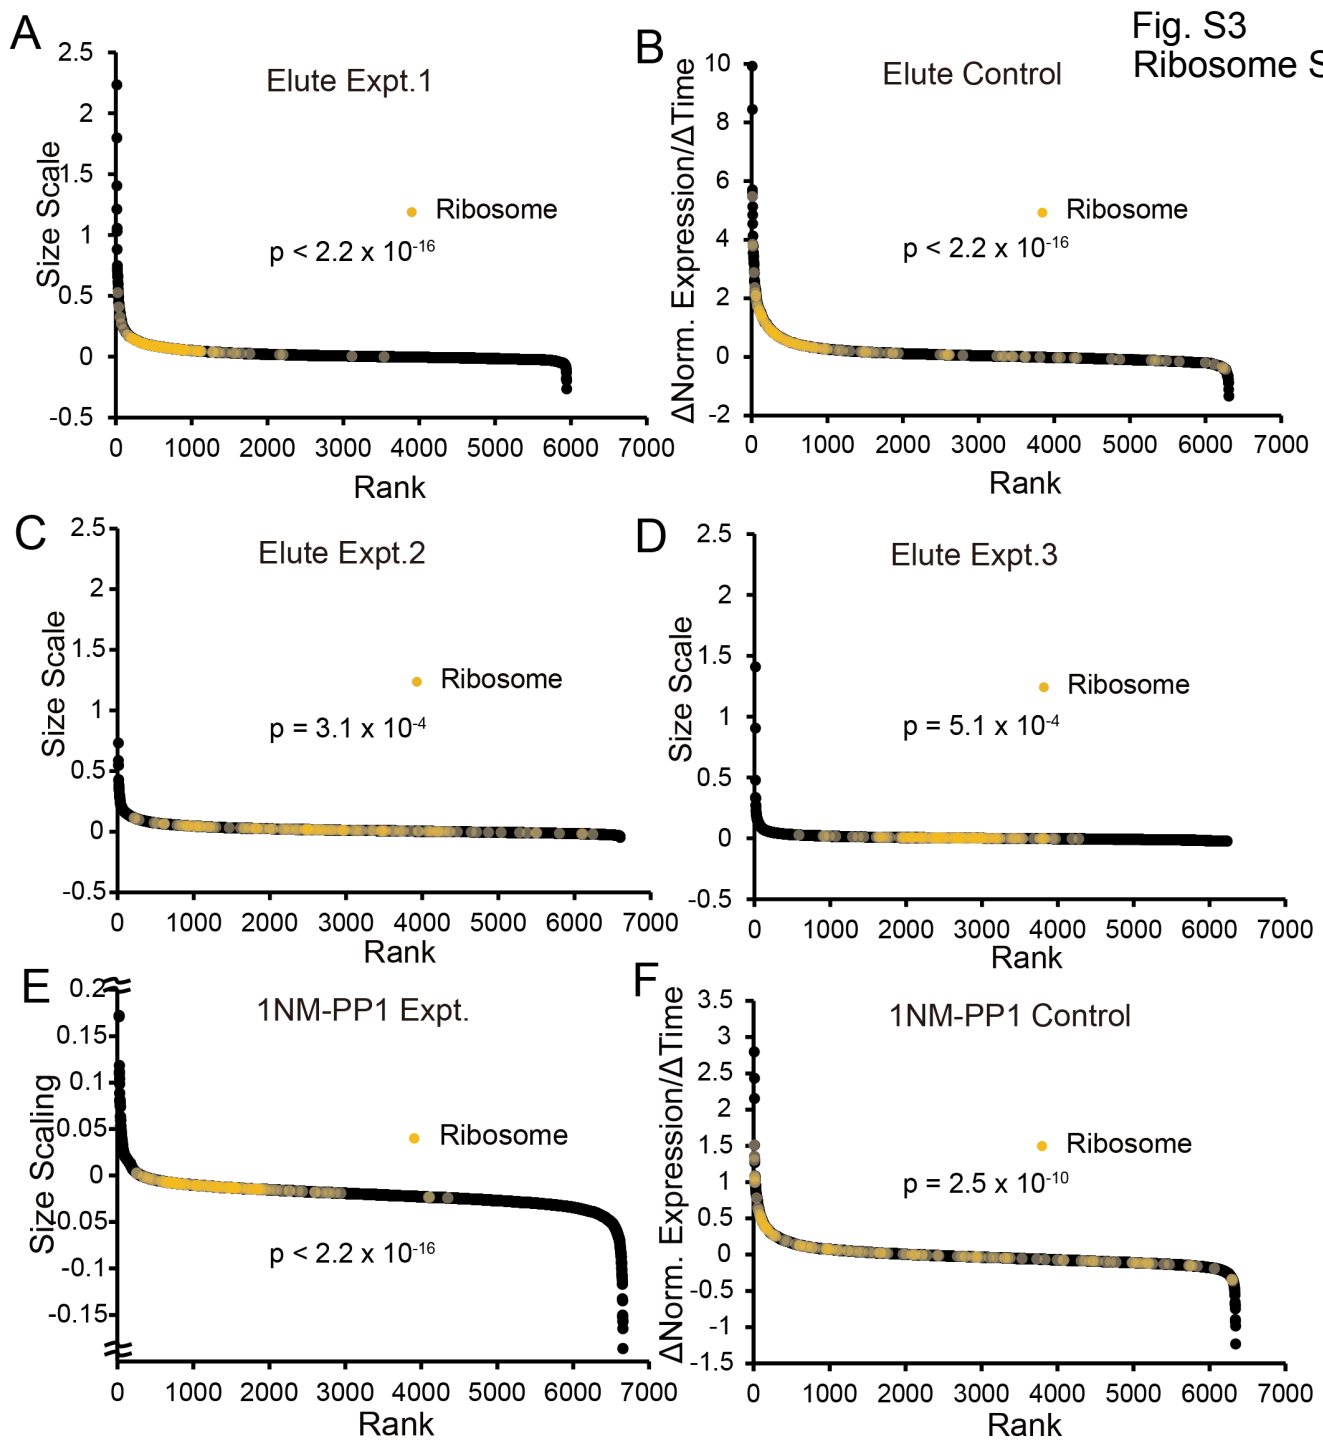

Figure S3. Ribosome Scaling. Size scaling of genes for ribosomal proteins (Related to Fig. 2).

The size-scaling for all ribosomal protein mRNAs is shown. Each ribosomal protein mRNA is marked by a yellow dot. The p-value is for a difference in distribution between the ribosomal protein mRNAs and all other mRNAs.  $2.2 \times 10^{-16}$  was the smallest p-value that could be returned by the software used. Note that super-scaling is present in the control experiments.

Fig. S4 Noise

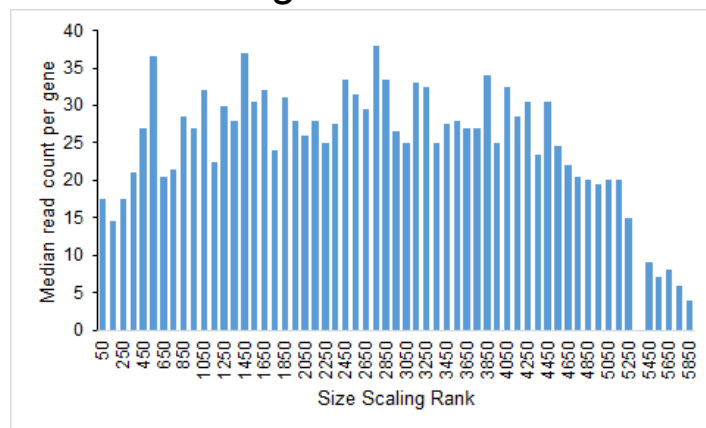

Figure S4. Contribution of Noise (Related to Fig. 2).

Genes were binned by size-scaling rank. The median number of mRNA reads per gene in each bin was plotted. Genes with very high ranks (i.e., scaling slower-than-size, right end of the distribution) tend to have few reads, and so may have high ranks partly because of noise.



# Fig. S5 Protein Scaling

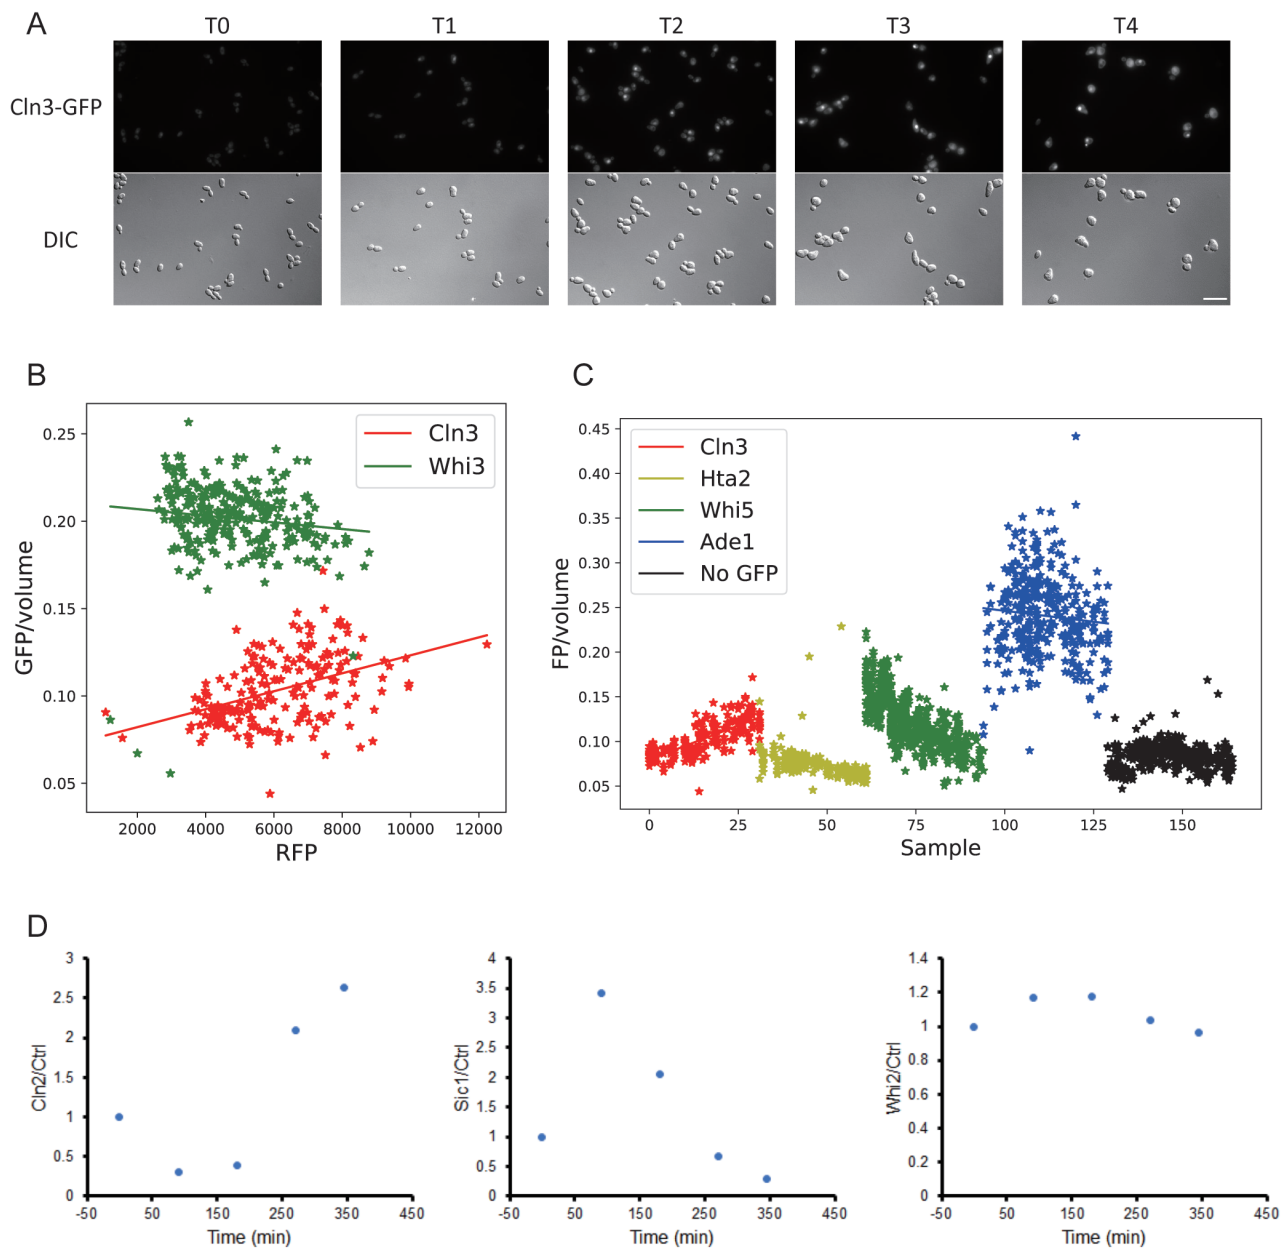

Figure S5A. Images of GFP-Cln3 (Related to Fig. 4).

Cln3 was visualized using the split-GFP system, with 5 copies of GFP beta-strand 11 fused to the N-terminus of Cln3 (Materials and Methods). Cells (*cdc28-as*) were grown to early exponential phase (Materials and Methods). 1NMPP1 was added at 0 time (T0), and a sample taken. Four more samples were taken at 90 minute intervals (T1, T2, T3, T4) (left to right). Cells in each sample were imaged for GFP fluorescence, and for cell morphology using DIC. Unbudded cells were chosen for quantitation (see Fig. 4, Fig. S5B, Fig. S5C). Scalebar = 20 microns.

Figure S5B. Scaling of Cln3 and Whi3 (Related to Fig. 4).

As Fig. 4, but with cell volumes calculated using the sum of intensity of the mCherry proxy, instead of cross-sectional area.

Figure S5C. Scaling of Whi5, Cln3, and controls (Related to Fig. 4).

As Fig. 4, but with the x-axis being sample number (0, 1, 2, 3, 4) rather than volume. Within a sample, points are offset along the x-axis to allow visibility, 6-8 offsets per sample. The “No GFP” sample is a negative control using a strain not containing GFP. The “Ade1” sample is a negative control with the Ade1 gene visualized using the split-GFP system; Ade1 was chosen because its mRNA levels were similar to the mRNA levels of many of the regulators of interest. “Hta2” is a scaling control, which should scale negatively (since the amount of Hta2 should be constant regardless of cell growth). Hta2 was visualized with an mCherry fusion. It was much brighter than any other construct, and was visualized using different settings on the camera and microscope. The y-axis is fluorescent protein per unit volume (i.e., fluorescence intensity per unit volume)

Figure S5D. Quantitation of Western Blots (Related to Fig. 4).

The Western blots of Fig. 4 were quantitated (Materials and Methods). The sample proteins (Cln2, Sic1, Whi2) are compared to both the Arp7 and the Tub1 controls using the exponentiated means of log ratios, normalized to time 0.

Fig. S6 mRNA half-lives

— LOWESS regression lines,  $f = 0.3$

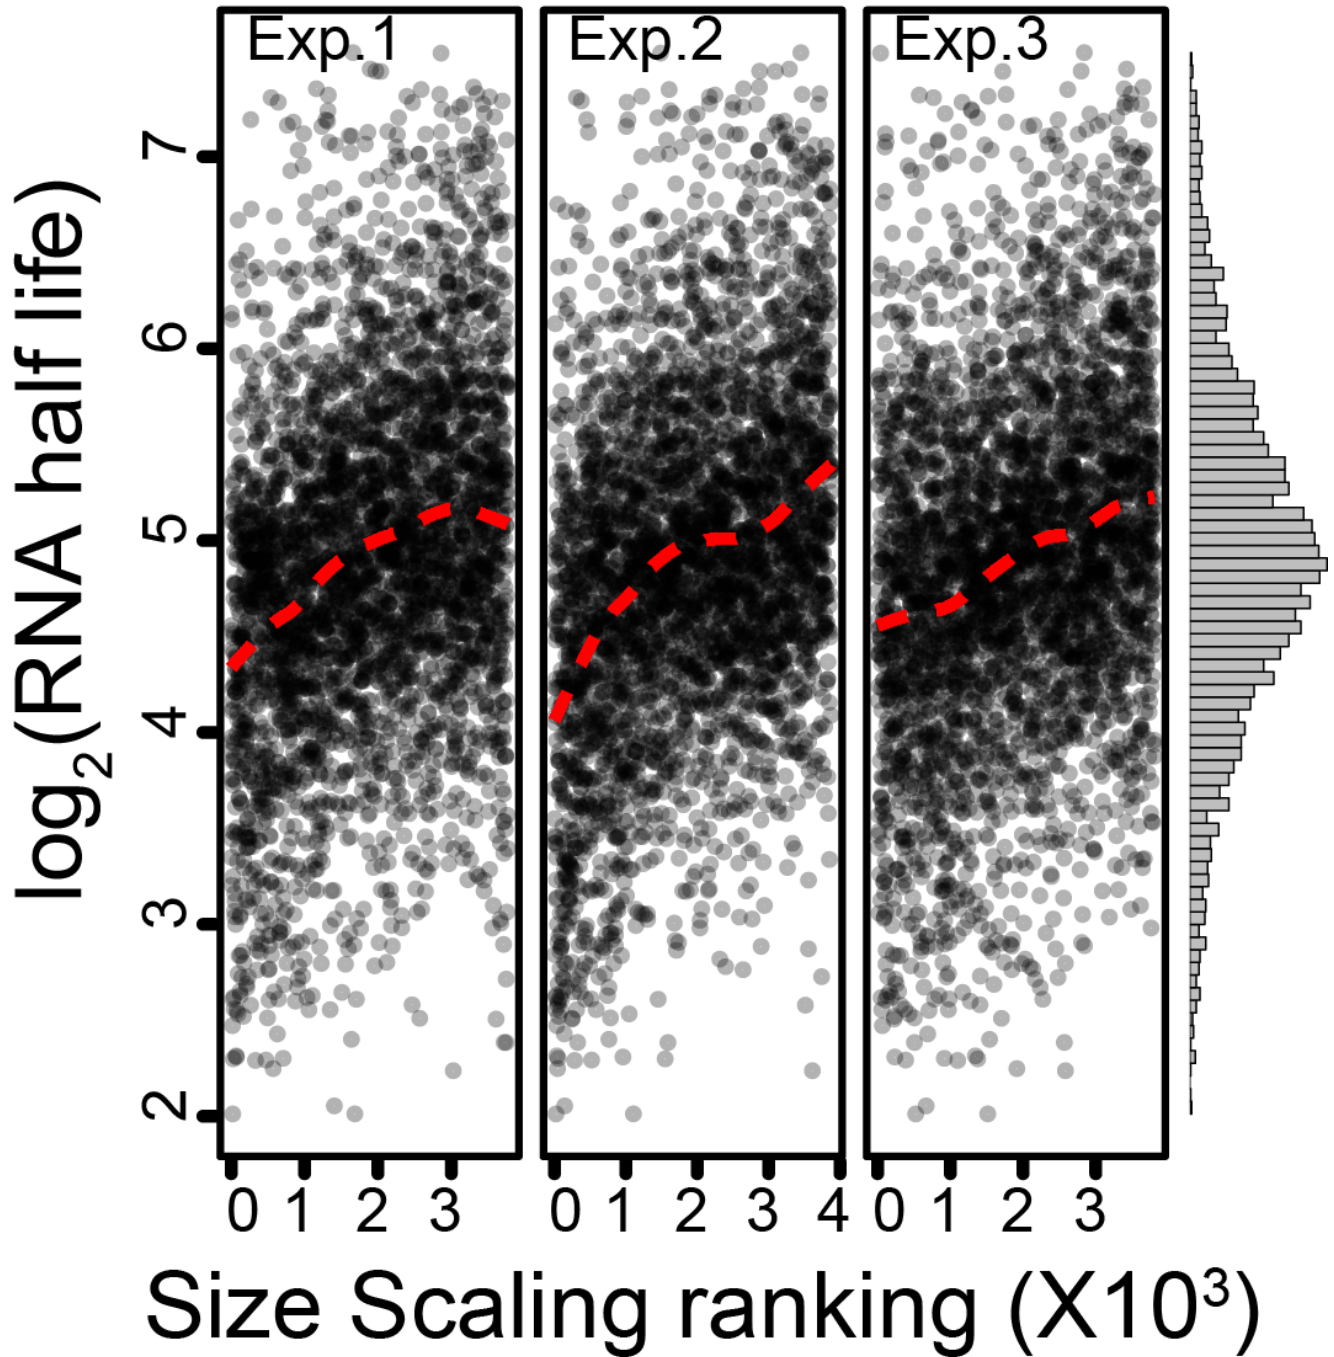

Figure S6. RNA half-lives correlate inversely with size scaling (Related to Fig. 5).

Correlation between  $\log(\text{RNA half-life})$  (y-axis) and rank of size scaling (x-axis) in the elutriation experiments. RNA half-lives were calculated by combining data from Wang et al. (2001) and Shalem et al. (2008). The average Spearman correlation between half-life and size-scaling over all three experiments is 0.36.

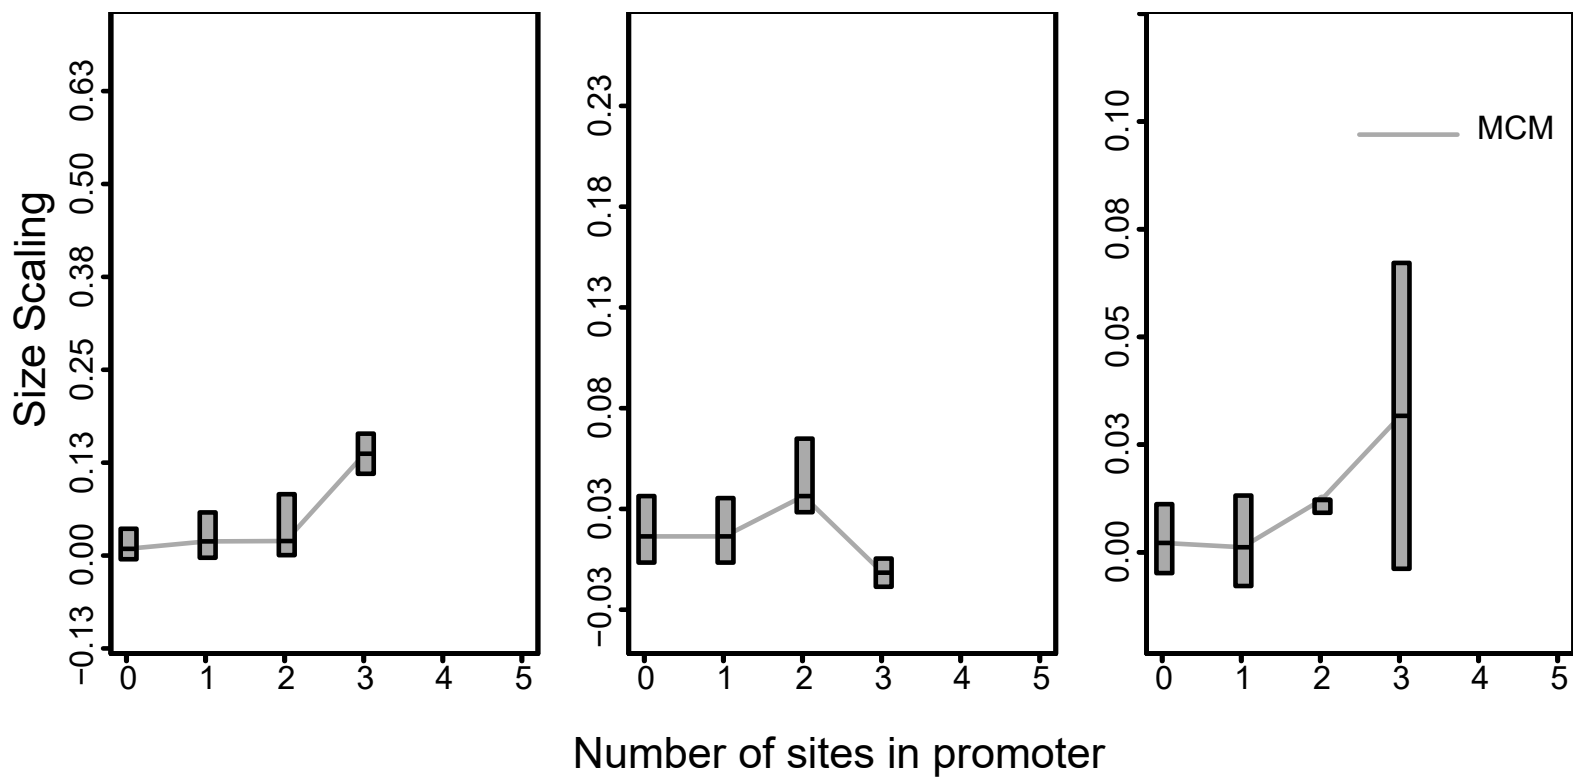

Fig. S7 MCM scaling, Expts 1 to 3

Figure S7. Size-scaling increases with number of binding sites for Mcm1 (Related to Fig. 5).  
As Fig. 5, but for the Mcm1 consensus binding site, TThCCnnnTnnGGnAA.

Table S2. Ranks of cell cycle activators and inhibitors

A

|            | Gene  | CCRS | Rank Exp. 1 | Rank Exp. 2 | Rank Exp.3 |
|------------|-------|------|-------------|-------------|------------|
| Activators | CLN2  | 10.9 | 19          | 73          | 62         |
|            | CDC28 | 0.7  | 91          | 170         | 84         |
|            | CLB2  | 10.5 | 6           | 50          | 1302       |
|            | CLB5  | 4.8  | 880         | 2714        | 198        |
|            | CLN1  | 5.4  | 519         | 336         | 1523       |
|            | CLN3  | 2.4  | 1058        | 732         | 3284       |
|            | BCK2  | 0.6  | 1337        | 2627        | 4757       |
|            | SWI4  | 3.2  | 3497        | 2338        | 438        |
| Inhibitors | SRL3  | 2.4  | 3347        | 1971        | 4908       |
|            | SIN3  | 0.4  | 4234        | 4802        | 4785       |
|            | RPD3  | 0.2  | 3604        | 4381        | 3406       |
|            | WHI4  | 0.4  | 4158        | 3814        | 5292       |
|            | WHI3  | 1.7  | 3708        | 4856        | 5839       |
|            | WHI2  | 0.4  | 4983        | 4156        | 5242       |
|            | SIC1  | 7.4  | 5646        | 1858        | 4227       |
|            | WHI5  | 1.4  | 6055        | 5781        | 6029       |

B

|              | Spearman correlations |
|--------------|-----------------------|
| Expt. 1 vs 2 | 0.68                  |
| Expt. 1 vs 3 | 0.77                  |
| Expt. 2 vs 3 | 0.75                  |

C

|        | Wilcoxon p-value<br>rank activator vs<br>inhibitor |
|--------|----------------------------------------------------|
| Expt.1 | $6.2 \times 10^{-4}$                               |
| Expt.2 | $4.7 \times 10^{-3}$                               |
| Expt.3 | $6.2 \times 10^{-4}$                               |

Table S2. Ranks of cell cycle activators and inhibitors (Related to Fig. 2).

The ranks of the scaling scores for each of the pre-selected cell cycle activators and inhibitors are given for each of the three elutriation experiments. Also shown are the experiment-to-experiment Spearman correlations for the 16 ranks, and the Wilcoxon p-values for the separations between activators and inhibitors. CCRS is the Cell Cycle Regulation Score from data of Spellman et al. 1998 (see <http://genome-www.stanford.edu/cgi-bin/cellcycle/search> for actual scores). Higher scores are more strongly cell cycle regulated.
